# Supplementary material for: Weaknesses in the reporting of cross-sectional studies according to the STROBE statement: the case of metabolic syndrome in adults from Peru
Source: PubMed Central journal article supplement (PMC4732506), 2015-12-30
Supplement: 1657-9534-cm-46-04-00168-s1.pdf [file 1657-9534-cm-46-04-00168-s1.pdf]

**Table s1: Recommendations from the STROBE Statement fulfilled by each article.**

| Recommendation           | Article*          |                   |                   |                   |                   |                   |                   |                   |                   |                    |                    |                    |                    |                    |                    |                    |                    |        |        |
|--------------------------|-------------------|-------------------|-------------------|-------------------|-------------------|-------------------|-------------------|-------------------|-------------------|--------------------|--------------------|--------------------|--------------------|--------------------|--------------------|--------------------|--------------------|--------|--------|
|                          | A-1 <sup>19</sup> | A-2 <sup>20</sup> | A-3 <sup>21</sup> | A-4 <sup>22</sup> | A-5 <sup>23</sup> | A-6 <sup>24</sup> | A-7 <sup>25</sup> | A-8 <sup>26</sup> | A-9 <sup>27</sup> | A-10 <sup>28</sup> | A-11 <sup>29</sup> | A-12 <sup>30</sup> | A-13 <sup>31</sup> | A-14 <sup>32</sup> | A-15 <sup>33</sup> | A-16 <sup>34</sup> | A-17 <sup>35</sup> |        |        |
| Title and abstract       |                   |                   |                   |                   |                   |                   |                   |                   |                   |                    |                    |                    |                    |                    |                    |                    |                    |        |        |
| Title and abstract       | 1                 | a                 | 1                 | 1                 | 0                 | 1                 | 0                 | 1                 | 1                 | 1                  | 1                  | 1                  | 1                  | 0                  | 1                  | 1                  | 0                  | 1      |        |
|                          |                   | b                 | 1                 | 0                 | 1                 | 1                 | 0                 | 1                 | 1                 | 1                  | 1                  | 1                  | 1                  | 1                  | 1                  | 1                  | 1                  | 1      | 1      |
|                          | Subtotal          | 2-Feb             | 1-Feb             | 1-Feb             | 2-Feb             | 0                 | 2-Feb             | 2-Feb             | 2-Feb             | 2-Feb              | 2-Feb              | 2-Feb              | 2-Feb              | 1-Feb              | 2-Feb              | 2-Feb              | 1-Feb              | 2-Feb  |        |
|                          |                   |                   | -100%             | -50%              | -50%              | -100%             | 0%                | -100%             | -100%             | -100%              | -100%              | -100%              | -100%              | -50%               | -100%              | -100%              | -50%               | -100%  |        |
| Introduction             |                   |                   |                   |                   |                   |                   |                   |                   |                   |                    |                    |                    |                    |                    |                    |                    |                    |        |        |
| Background/rationale     | 2                 | 1                 | 1                 | 1                 | 1                 | 1                 | 1                 | 1                 | 1                 | 1                  | 1                  | 1                  | 1                  | 1                  | 1                  | 1                  | 1                  | 1      |        |
| Objetives                | 3                 | 1                 | 0                 | 0                 | 1                 | 0                 | 0                 | 1                 | 1                 | 1                  | 1                  | 1                  | 1                  | 1                  | 1                  | 1                  | 1                  | 1      |        |
|                          |                   | 2-Feb             | 1-Feb             | 1-Feb             | 2-Feb             | 1-Feb             | 1-Feb             | 2-Feb             | 2-Feb             | 2-Feb              | 2-Feb              | 2-Feb              | 2-Feb              | 2-Feb              | 2-Feb              | 2-Feb              | 2-Feb              | 2-Feb  |        |
|                          |                   |                   | -100%             | -50%              | -50%              | -100%             | -50%              | -50%              | -100%             | -100%              | -100%              | -100%              | -100%              | -100%              | -100%              | -100%              | -100%              | -100%  |        |
| Métods                   |                   |                   |                   |                   |                   |                   |                   |                   |                   |                    |                    |                    |                    |                    |                    |                    |                    |        |        |
| Study design             | 4                 | 1                 | 1                 | 1                 | 1                 | 1                 | 1                 | 1                 | 1                 | 1                  | 1                  | 1                  | 1                  | 1                  | 1                  | 1                  | 1                  | 1      |        |
| Setting                  | 5                 | 1                 | 1                 | 1                 | 0                 | 0                 | 1                 | 1                 | 0                 | 0                  | 0                  | 1                  | 1                  | 1                  | 1                  | 0                  | 0                  | 1      |        |
| Participants             | 6                 | 1                 | 1                 | 1                 | 1                 | 1                 | 1                 | 1                 | 1                 | 1                  | 1                  | 1                  | 1                  | 1                  | 1                  | 1                  | 1                  | 1      |        |
| Variables                | 7                 | 1                 | 0                 | 1                 | 1                 | 1                 | 1                 | 1                 | 1                 | 1                  | 1                  | 1                  | 1                  | 1                  | 1                  | 1                  | 1                  | 1      |        |
| Data sources/measurement | 8                 | 1                 | 0                 | 1                 | 1                 | 1                 | 1                 | 1                 | 1                 | 1                  | 1                  | 1                  | 1                  | 1                  | 1                  | 1                  | 1                  | 1      |        |
| Bias                     | 9                 | 0                 | 0                 | 0                 | 0                 | 1                 | 0                 | 0                 | 0                 | 1                  | 0                  | 1                  | 1                  | 0                  | 1                  | 0                  | 1                  | 1      |        |
| Study size               | 10                | 1                 | 1                 | 0                 | 1                 | 1                 | 0                 | 0                 | 0                 | 1                  | 0                  | 0                  | 1                  | 0                  | 1                  | 0                  | 1                  | 1      |        |
| Quantitative variables   | 11                |                   | 1                 | 0                 | 1                 | 1                 | 1                 | 1                 | 1                 | 1                  | 1                  | 1                  | 1                  | 1                  | 1                  | 1                  | 1                  | 1      |        |
|                          |                   | a                 | 0                 | 0                 | 1                 | 1                 | 1                 | 1                 | 1                 | 1                  | 1                  | 1                  | 1                  | 1                  | 1                  | 1                  | 1                  | 1      | 1      |
|                          |                   | b                 | 0                 | 0                 | 1                 | 1                 | 1                 | 1                 | 1                 | 1                  | 1                  | 1                  | 1                  | 1                  | 1                  | 1                  | 1                  | 1      | 1      |
| Statistical methods      | 12                | c                 | 0                 | 0                 | 0                 | 0                 | 0                 | 0                 | 0                 | 0                  | 0                  | 0                  | 1                  | 1                  | 0                  | 1                  | 0                  | 0      | 1      |
|                          |                   | d                 | 0                 | 0                 | 0                 | 0                 | 1                 | 1                 | NA                | 1                  | 1                  | 1                  | 0                  | NA                 | 0                  | NA                 | 1                  | 1      | NA     |
|                          |                   | e                 | 0                 | 0                 | 1                 | 0                 | 0                 | 0                 | 0                 | 0                  | 0                  | 0                  | NA                 | NA                 | 0                  | NA                 | 0                  | 0      | NA     |
|                          |                   | Subtotal          | Jul-13            | Apr-13            | Sep-13            | Aug-13            | Oct-13            | Sep-13            | 8-Dec             | Aug-13             | Oct-13             | Aug-13             | 10-Dec             | 11-Nov             | Aug-13             | 11-Nov             | Aug-13             | Oct-13 | 11-Nov |
|                          |                   | -54%              | -31%              | -69%              | -62%              | -77%              | -69%              | -66%              | -62%              | -77%               | -62%               | -83%               | -100%              | -62%               | -100%              | -62%               | -77%               | -100%  |        |
| Results                  |                   |                   |                   |                   |                   |                   |                   |                   |                   |                    |                    |                    |                    |                    |                    |                    |                    |        |        |
| Participants             | 13                | a                 | 0                 | 1                 | 0                 | 0                 | 0                 | 0                 | 0                 | 0                  | 0                  | 0                  | 1                  | 0                  | 1                  | 0                  | 0                  | 1      |        |
|                          |                   | b                 | 0                 | 1                 | 0                 | 0                 | 0                 | 0                 | 1                 | 0                  | 0                  | 0                  | 0                  | 1                  | 0                  | 1                  | 0                  | 0      | 1      |
|                          |                   | c                 | 0                 | 0                 | 0                 | 0                 | 0                 | 0                 | 0                 | 0                  | 0                  | 0                  | 0                  | 1                  | 0                  | 1                  | 0                  | 0      | 1      |
| Descriptive data         | 14                | a                 | 1                 | 1                 | 1                 | 1                 | 0                 | 1                 | 1                 | 1                  | 0                  | 0                  | 1                  | 1                  | 1                  | 1                  | 0                  | 1      |        |
|                          |                   | b                 | 0                 | 0                 | 0                 | 0                 | 0                 | 0                 | 0                 | 0                  | 0                  | 0                  | 0                  | 1                  | 0                  | 1                  | 0                  | 0      | 1      |
| Outcome data             | 15                | 1                 | 1                 | 1                 | 1                 | 1                 | 1                 | 1                 | 1                 | 1                  | 1                  | 1                  | 1                  | 1                  | 1                  | 1                  | 1                  | 1      |        |
| Main results             | 16                | a                 | 1                 | 1                 | 1                 | 1                 | 0                 | 1                 | 1                 | 1                  | 1                  | 1                  | 1                  | 1                  | 1                  | 1                  | 1                  | 1      | 1      |
|                          |                   | b                 | NA                | NA                | NA                | NA                | NA                | NA                | NA                | NA                 | NA                 | NA                 | NA                 | NA                 | NA                 | NA                 | NA                 | NA     | NA     |
|                          |                   | c                 | NA                | NA                | NA                | NA                | NA                | NA                | NA                | NA                 | NA                 | NA                 | NA                 | NA                 | NA                 | NA                 | NA                 | NA     | NA     |
| Other analyses           | 17                | 0                 | 1                 | 1                 | 1                 | 0                 | 1                 | 1                 | 1                 | 1                  | 1                  | 1                  | 1                  | 1                  | 1                  | 1                  | 1                  | 1      |        |
|                          |                   | 3-Aug             | 6-Aug             | 4-Aug             | 4-Aug             | 1-Aug             | 4-Aug             | 5-Aug             | 4-Aug             | 3-Aug              | 3-Aug              | 4-Aug              | 8-Aug              | 4-Aug              | 8-Aug              | 4-Aug              | 3-Aug              | 8-Aug  |        |
|                          |                   |                   | -38%              | -75%              | -50%              | -50%              | -13%              | -50%              | -63%              | -50%               | -38%               | -38%               | -50%               | -100%              | -50%               | -100%              | -50%               | -38%   | -100%  |
| Discussion               |                   |                   |                   |                   |                   |                   |                   |                   |                   |                    |                    |                    |                    |                    |                    |                    |                    |        |        |
| Key results              | 18                | 1                 | 1                 | 1                 | 1                 | 0                 | 1                 | 1                 | 1                 | 1                  | 1                  | 1                  | 1                  | 1                  | 1                  | 1                  | 1                  | 1      |        |
| Limitations              | 19                | 0                 | 0                 | 1                 | 0                 | 0                 | 1                 | 0                 | 1                 | 0                  | 0                  | 1                  | 1                  | 1                  | 1                  | 1                  | 0                  | 1      |        |
| Interpretation           | 20                | 0                 | 0                 | 1                 | 1                 | 0                 | 1                 | 1                 | 1                 | 1                  | 1                  | 1                  | 1                  | 1                  | 1                  | 1                  | 1                  | 1      |        |
| Generalizability         | 21                | 1                 | 0                 | 1                 | 1                 | 0                 | 1                 | 1                 | 1                 | 0                  | 1                  | 1                  | 1                  | 1                  | 1                  | 1                  | 0                  | 1      |        |
|                          |                   | 2-Apr             | 1-Apr             | 4-Apr             | 3-Apr             | 0/0               | 4-Apr             | 3-Apr             | 4-Apr             | 2-Apr              | 3-Apr              | 4-Apr              | 4-Apr              | 4-Apr              | 4-Apr              | 4-Apr              | 2-Apr              | 4-Apr  |        |
|                          |                   |                   | -50%              | -25%              | -100%             | -75%              | 0%                | -100%             | -75%              | -100%              | -50%               | -75%               | -100%              | -100%              | -100%              | -100%              | -50%               | -100%  |        |
| Other information        |                   |                   |                   |                   |                   |                   |                   |                   |                   |                    |                    |                    |                    |                    |                    |                    |                    |        |        |
| Funding                  | 22                | 1                 | 1                 | 1                 | 1                 | 0                 | 1                 | 0                 | 1                 | 1                  | 0                  | 1                  | 1                  | 1                  | 1                  | 0                  | 1                  | 1      |        |
|                          |                   | 1-Jan             | 1-Jan             | 1-Jan             | 1-Jan             | 0/0               | 1-Jan             | 0/0               | 1-Jan             | 1-Jan              | 0/0                | 1-Jan              | 1-Jan              | 1-Jan              | 1-Jan              | 1-Jan              | 0/0                | 1-Jan  |        |
|                          |                   |                   | -100%             | -100%             | -100%             | -100%             | 0%                | -100%             | 0%                | -100%              | -100%              | 0%                 | -100%              | -100%              | -100%              | -100%              | 0%                 | -100%  |        |
|                          |                   | 17/30             | 14/30             | 20/30             | 20/30             | Dec-30            | 21/30             | 20/29             | 21/30             | 20/30              | 18/30              | 23/29              | 28/28              | 20/30              | 28/28              | 21/30              | 18/30              | 28/28  |        |
|                          |                   |                   | -57%              | -47%              | -67%              | -67%              | -40%              | -70%              | -69%              | -70%               | -67%               | -60%               | -79%               | -100%              | -67%               | -100%              | -70%               | -60%   | -100%  |

\*References from each article are describe in the manuscript.
